# Supplementary material
Source: PubMed Central journal article supplement (PMC4904248)
Supplement: ml6b00045_si_001.pdf [file ml6b00045_si_001.pdf]

## **Supporting Information**

### **Development of potent and selective *S. aureus* sortase A inhibitors based on peptide macrocycles**

Inmaculada Rentero Rebollo, Shawna McCallin, Davide Bertoldo, José Manuel Entenza,  
Philippe Moreillon and Christian Heinis\*

## Supplementary Methods

### *SrtA production*

Vector pHTT14 was transformed into *E. coli* XL1-blue, the cells grown on selective ampicillin plates, and cells of a colony grown in LB (100 µg/ml ampicillin) until  $OD_{600} = 0.5$ . SrtA expression was induced by addition of 1 mM IPTG, and protein production was allowed for 4 h at 25 °C. Cells were harvested by centrifugation and resuspended in cold lysis buffer (30 mM  $NaH_2PO_4$ , 300 mM NaCl, 0.1% Triton X-100, 50 µg/ml DNase, 100 µg/ml lysozyme, pH 7.4) by sonication. Lysates were cleared by centrifugation (9000 rpm, 4 °C, 1 hr). (His)<sub>6</sub>-SrtA<sub>26-206</sub> was purified by nickel affinity chromatography using 30 mM  $NaH_2PO_4$ , 300 mM NaCl, 10 mM imidazole, pH 7.4 as running buffer, and running buffer + 500 mM imidazole for elution, followed by size exclusion chromatography (PBS buffer) (Figure S3).

### *High-throughput sequencing*

Phage vector was isolated from TG1 *E. coli* cells with a commercial plasmid purification kit (NucleoSpin Plasmid; Macherey-Nagel), and samples were prepared as previously described (Rebollo, et al., 2014), 100 ng phage vector DNA was amplified by PCR using primers containing adapter sequences and barcodes. The concentration of DNA was determined using a High Sensitivity DNA Assay Kit (Agilent), following the manufacturer's protocol. Ion Torrent sequencing was performed by the Lausanne Center of Genomic Technologies (University of Lausanne, Switzerland) on an Ion Personal Genome Machine (PGM<sup>TM</sup>) Sequencer, using an Ion Torrent 316<sup>TM</sup> chip.

### *Calculation of $K_i$*

For  $IC_{50}$ s higher than 10 µM, the inhibitory constant  $K_i$  was calculated according to the equation of Cheng and Prusoff  $K_i = IC_{50}/(1 + [S]_0/K_m)$ , wherein  $IC_{50}$  is the functional strength of the inhibitor,  $[S]_0$  is the total substrate concentration, and  $K_m$  is the Michaelis–Menten constant. The reported  $K_m$  values for LPETG substrates of SrtA are between 5 and 7 mM, and therefore  $K_i \approx IC_{50}$ . For  $IC_{50}$ s lower than 10 µM, a second series was performed using 1 µM enzyme and 50 µM substrate, and  $K_i$ s were calculated accordingly. For  $IC_{50}$ s lower than 3 µM in this second series, data was fitted to the Morrison equation, where  $V_i$  and  $V_0$  are the reaction velocities in the presence and absence of inhibitor, respectively.  $E_0$  and  $I_0$  represent the total enzyme and

inhibitor concentration, respectively.  $K_i$  is the inhibition constant in the presence of fluorogenic substrate. Fitting curves were generated using OriginPro 8G software (OriginLab Corporation):

$$V_i/V_0 = 1 - \frac{E_0 + I_0 + K_i - \sqrt{(E_0 + I_0 + K_i)^2 - 4E_0I_0}}{2E_0}$$

#### *Calculation of $K_d$*

The dissociation constants ( $K_d$ ) were determined by non-linear regression analyses of fluorescence polarization ( $F_p$ ) versus total concentration of SrtA ( $P_T$ ) using the following equation:

$$F_p = F_{p \min} + (F_{p \max} - F_{p \min}) \frac{L_T + P_T + K_D - \sqrt{(L_T + P_T + K_D)^2 - 4L_T P_T}}{2L_T}$$

$F_{p \min}$  and  $F_{p \max}$  are the fluorescence polarization for the free peptide and the fully bound peptide respectively, and  $L_T$  is the total concentration of fluorescent ligand (200 nM). Fitting curves were generated using OriginPro 8G software (OriginLab Corporation).

## Supplementary Figures

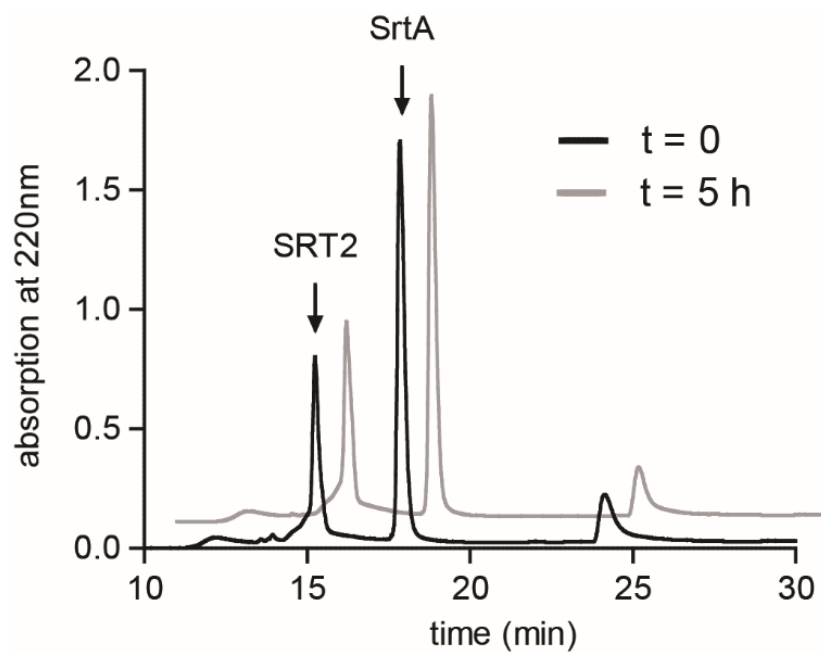

**Figure S1.** Resistance of bicyclic peptides to cleavage by SrtA. HPLC chromatograms of bicyclic peptide **2** (0.5 mM) incubated with SrtA (0.2 mM) for 0 and 5 hrs.

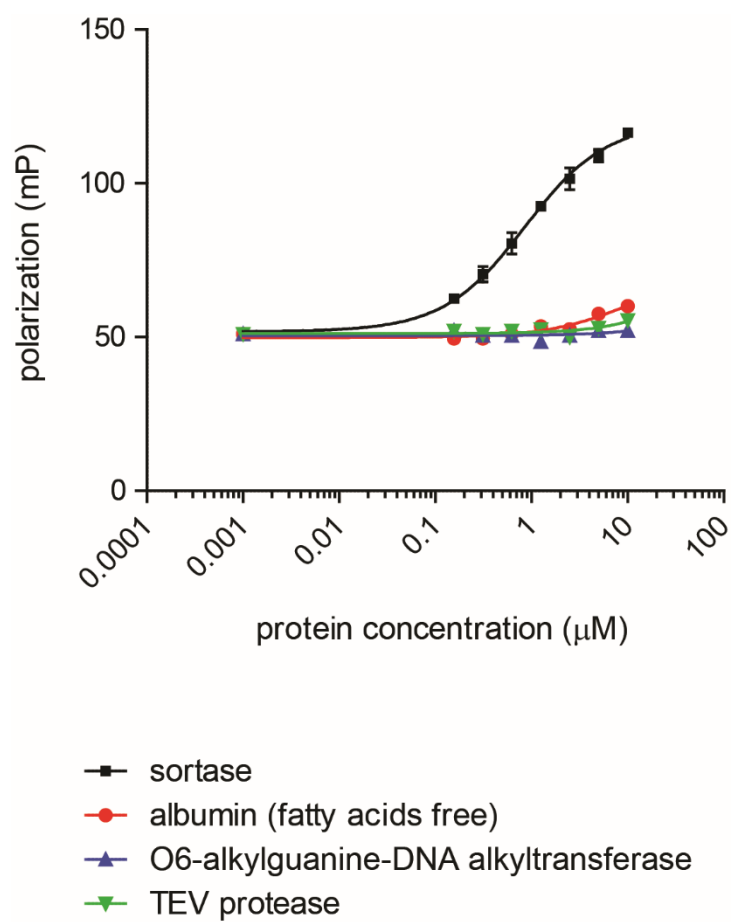

**Figure S2.** Specificity of a bicyclic peptide SrtA inhibitor. Fluorescence polarization of bicyclic peptide **2** labeled with fluorescein incubated with increasing concentrations of the indicated proteins.

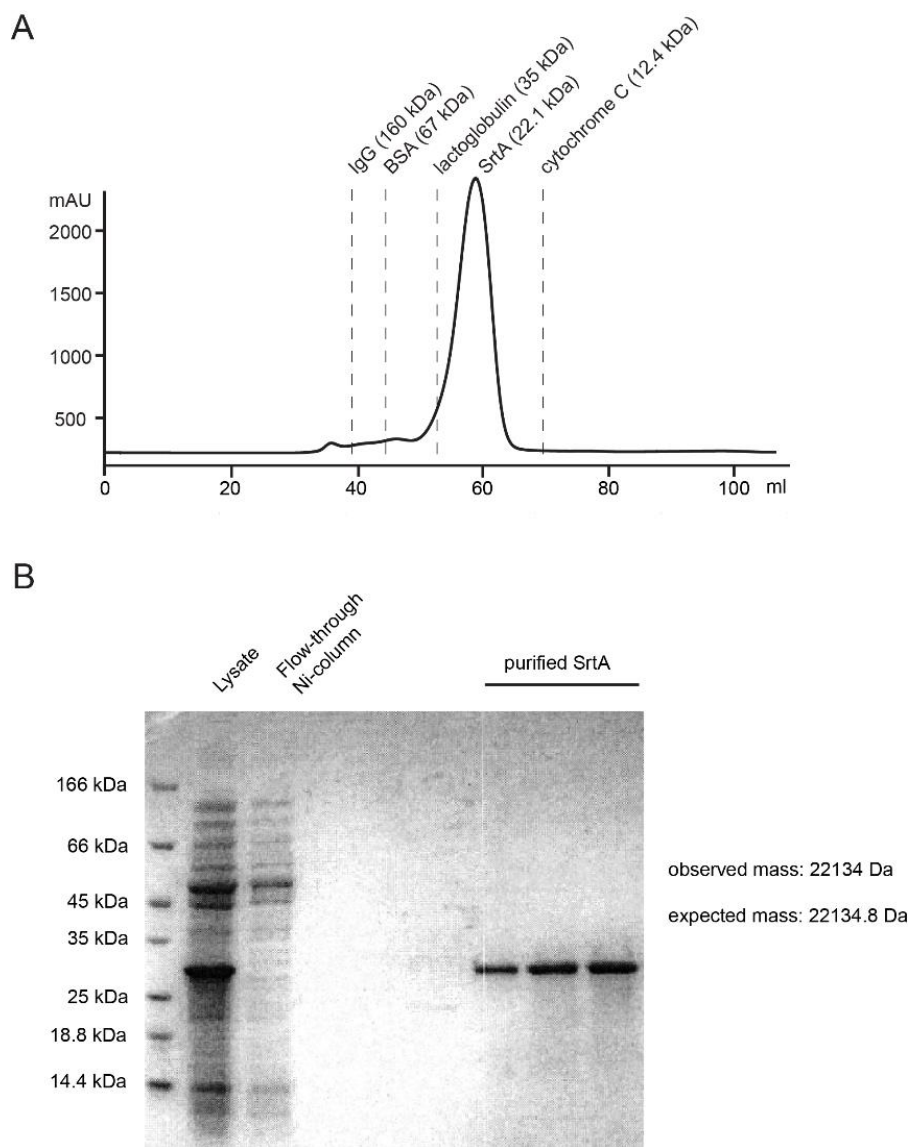

**Figure S3.** Purification of His6-SrtA<sub>ΔN</sub>. (A) Size exclusion chromatogram after nickel-column purification. (B) Analysis of proteins by SDS-PAGE.

## Supplementary Tables

**Table S1**

*Most abundant 100 peptides of Library A*

| Peptide sequence    | Freq | Nucleotide sequence                                     |
|---------------------|------|---------------------------------------------------------|
| MAACRQLPPCSFECGGSG  | 5059 | ATGGCAGCATGCAGGTAGCTTCCTCCTTGCTCTTCGAGTGTGGCGTTCTGGCG   |
| MAACQLPPCPFNCGGSG   | 1514 | ATGGCAGCATGCTAGCTCCTTCCGCCCTTGCCCTTTTAATTGTGGCGTTCTGGCG |
| MAACPQLPPCRVSCGGSG  | 1343 | ATGGCAGCATGCCCTTAGCTCCCTCCCTGCCGCGTGTCTTGTGGCGTTCTGGCG  |
| MAACPLLPPCADDPCGGSG | 853  | ATGGCAGCATGCCCTTGCTCCCTCCCTGCGCTGATGATTGTGGCGTTCTGGCG   |
| MAACAILPPCDQNCGGSG  | 684  | ATGGCAGCATGCGCCATTCTCCCCCGTGCAGCTAGAAATTGTGGCGTTCTGGCG  |
| MAACLQLPPCNVSCGGSG  | 627  | ATGGCAGCATGCTGTAGCTTCCTCCTTGCAACGTGTCTGTGGCGTTCTGGCG    |
| MAACPLLPPCSLDCGGSG  | 601  | ATGGCAGCATGCCCTTGCTGCCGCTTGCAGTCTGGATTGTGGCGTTCTGGCG    |
| MAACPYLPPCQLACGGSG  | 598  | ATGGCAGCATGCCCTACCTTCCTCCCTGCTAGCTGGCGTGTGGCGTTCTGGCG   |
| MAACLQLPPCSSPCGGSG  | 548  | ATGGCAGCATGCTTGTAGCTTCCTCCCTGCTCGTCCCGTGTGGCGTTCTGGCG   |
| MAACPQLPPCGTFCGGSG  | 461  | ATGGCAGCATGCCCTTAGCTGCCCTTGCGGTACTTTTTGTGGCGTTCTGGCG    |
| MAACPALPPCQLSCGGSG  | 447  | ATGGCAGCATGCCCTGCGTGTGCCCGTGTAGTGTCTTGTGGCGTTCTGGCG     |
| MAACPQLPPCLYPCGGSG  | 400  | ATGGCAGCATGCCCTAGCTCCCCCGTGCCTGTATCCTTGTGGCGTTCTGGCG    |
| MAACQQGCTVLPCCGGSG  | 383  | ATGGCAGCATGCTAGCAGGGTGCAGTGTGCTTCCGCCCTGTGGCGTTCTGGCG   |
| MAACPSLPPCPWNCGGSG  | 347  | ATGGCAGCATGCCCGAGTCTTCCCCCGTGCCCTGGAATTGTGGCGTTCTGGCG   |
| MAACSQLPPCARGCGGSG  | 338  | ATGGCAGCATGCAGCTAGTTGCCCTCCTGCGCTCGGGTGTGGCGTTCTGGCG    |
| MAACLQLPPCNHHCGGSG  | 296  | ATGGCAGCATGCTCTAGCTGCCTCCTTGCAACCATCACTGTGGCGTTCTGGCG   |
| MAACILPPCSYTQCGGSG  | 292  | ATGGCAGCATGCATCTTGCTCCCTGCTCTTACACGTAGTGTGGCGTTCTGGCG   |
| MAACAILPPCQPRCGGSG  | 289  | ATGGCAGCATGCGCCATTCTCCCTCCGTGTAGCTCCGGTGTGGCGTTCTGGCG   |
| MAACPLLPPCGIGCGGSG  | 289  | ATGGCAGCATGCCCTTGCTGCCCTCCGTGCGGTATTGGCTGTGGCGTTCTGGCG  |
| MAACYLLPPCQLGCGGSG  | 278  | ATGGCAGCATGCTATCTGCTTCCCCCTGCTAGTTGGGCTGTGGCGTTCTGGCG   |
| MAACRGTCPVLPCCGGSG  | 269  | ATGGCAGCATGCAGGGCACCTGCCCGTTCGCTCCTTGTGGCGTTCTGGCG      |
| MAVRCPLPPYQCCGGSG   | 262  | ATGGCAGTGCCTGCCCCCTTGCCGCCGATTAGTGTGTGGCGTTCTGGCG       |
| MAACPYLPPCGESCGGSG  | 250  | ATGGCAGCATGCCCTACCTTCCCCCGTGCGGGAGAGTGTGGCGTTCTGGCG     |
| MAACSILPPCSQNCGGSG  | 246  | ATGGCAGCATGCTCTATCCTTCCTCCTTGCTCTTAGAATTGTGGCGTTCTGGCG  |
| MAACQTGCPIPPCGGSG   | 246  | ATGGCAGCATGCTAGACGGGTGCCCGATTCTGCCTCCCTGTGGCGTTCTGGCG   |
| MAACQILPPCFQPCGGSG  | 242  | ATGGCAGCATGCTAGATTTTGCCGCCGTCTTACAGCCCTGTGGCGTTCTGGCG   |
| MAACPSLPPCNQHCGGSG  | 242  | ATGGCAGCATGCCCTCTCCTCCCTGCAATTAGCATTGTGGCGTTCTGGCG      |
| MAACPYLPPCPLDCGGSG  | 210  | ATGGCAGCATGCCCTTATCTCCCTCCTTGCCCTTTGGATTGTGGCGTTCTGGCG  |
| MAACQVLPPCGFICGGSG  | 202  | ATGGCAGCATGCTAGGTGCTTCCTCCGTGCGGTTTCATCTGTGGCGTTCTGGCG  |
| MAACSLPPCQLSCGGSG   | 202  | ATGGCAGCATGCAGTCTGTGGCCCTTGCTAGTTGCTGCTGTGGCGTTCTGGCG   |
| MAACSILPPCFQTCGGSG  | 190  | ATGGCAGCATGCAGCATCTTGCCCCCTGCTTCTAGACCTGTGGCGTTCTGGCG   |
| MAARMKSSCLPPCCGGSG  | 185  | ATGGCAGCACGCATGAAGAGTAGTTGCCTCCCTCCGTGCTGTGGCGTTCTGGCG  |
| MAACAQLPPCSLPCGGSG  | 183  | ATGGCAGCATGCGCTTAGTTGCCGCCGTGCTCTTCCGTGTGGCGTTCTGGCG    |
| MAACYQLPPCDHSCGGSG  | 177  | ATGGCAGCATGCTACTAGTTGCCCTCCCTGCGATCACAGTGTGGCGTTCTGGCG  |
| MAACPQLPPCVLACGGSG  | 171  | ATGGCAGCATGCCCTTAGCTTCCGCCGTGCTGCTCGCGTGTGGCGTTCTGGCG   |
| MAACKRTHCLPPCCGGSG  | 169  | ATGGCAGCATGCAAGCGTACCCATTGCCTCCCCCTGTTGTGGCGTTCTGGCG    |
| MAACRQLPPCSDDPCGGSG | 164  | ATGGCAGCATGCCCTTAGTTGCCCTCCCTGCAGCGATCCCTGTGGCGTTCTGGCG |
| MAACRGHCPIPPCGGSG   | 162  | ATGGCAGCATGCCGTGCCATTGCCCTATCTCCCTCCTTGTGGCGTTCTGGCG    |

|                     |     |                                                         |
|---------------------|-----|---------------------------------------------------------|
| MAACYLPPCQLQLCGGSG  | 157 | ATGGCAGCATGCTATCTTCCCCCTTGCCAGCTGTAGTTGTGTGGCGGTTCTGGCG |
| MAACSILPCTTHCGGSG   | 154 | ATGGCAGCATGCTCCATTTTGCCGCCCTTGACGACGCATTGTGGCGGTTCTGGCG |
| MAACSRHCLTLPPCGGSG  | 149 | ATGGCAGCATGCAGTCGTCAATGCCTGACTCTTCTCCGTGTGGCGGTTCTGGCG  |
| MAACPVLPPCSRPCGGSG  | 149 | ATGGCAGCATGCCCGTGTGGCCCTTGACAGTCGTCTTGTGGCGGTTCTGGCG    |
| MAACLQLPPCDFQCGGSG  | 147 | ATGGCAGCATGCCTTAGCTTCTCCCTGCGATTTTCAGTGTGGCGGTTCTGGCG   |
| MAACPYLPPCGTICGGSG  | 147 | ATGGCAGCATGCCCTATCTGCCTCCCTTGCGGCACGATCTGTGGCGGTTCTGGCG |
| MAACALLPPCNQCGGSG   | 145 | ATGGCAGCATGCGCTCTGTGCGCCCTGCAATTAGAACTGTGGCGGTTCTGGCG   |
| MAACHSRCPQLPPCGGSG  | 138 | ATGGCAGCATGCCATAGTAGGTGCCCTAGCTTCCCCGTGTGGCGGTTCTGGCG   |
| MAACLPPCPLLPCGGSG   | 133 | ATGGCAGCATGCCTGCCTCTTGCCCGTGTGGCGGTTCTGGCG              |
| MAACKLLPPCQFECGGSG  | 130 | ATGGCAGCATGCAAGCTTTGCTCCGTGCTAGTTCGAGTGTGGCGGTTCTGGCG   |
| MAACYGQCTQLPPCGGSG  | 129 | ATGGCAGCATGCTACGGTCAGTGCCTTAGCTGCCTCTTGTGGCGGTTCTGGCG   |
| MAACPYLPPCSYTCGGSG  | 129 | ATGGCAGCATGCCCTTACCTTCCGCCGTGCTCTACACTTGTGGCGGTTCTGGCG  |
| MAACPFLPPCSSACGGSG  | 126 | ATGGCAGCATGCCCTTTCTTGCCCCCTGCTCGAGTGCTTGTGGCGGTTCTGGCG  |
| MAACGQLPPCDAMCGGSG  | 126 | ATGGCAGCATGCGGCTAGCTGCCCCCTGCGATGCTATGTGTGGCGGTTCTGGCG  |
| MAACQTYASCVLRCCGGSG | 125 | ATGGCAGCATGCTAGACTTATGCCTCGTGCCTCCGTGTGGCGGTTCTGGCG     |
| MAACGYLPPCPLSCGGSG  | 122 | ATGGCAGCATGCGGTTATCTCCCTCCCTGCCCTCTCTCTGTGGCGGTTCTGGCG  |
| MAACSVLPPCSFSCGGSG  | 122 | ATGGCAGCATGCTCTGTCTTCTCCCTGCTCCTCTCTCGTGTGGCGGTTCTGGCG  |
| MAACILPPCPSSCGGSG   | 122 | ATGGCAGCATGCATTCTCCCCCGTCCCTTCTCTGTGTGGCGGTTCTGGCG      |
| MAACPVLPPCPINCGGSG  | 122 | ATGGCAGCATGCCCGTCTGCCTCCCTGCCCTATTAAGTGTGGCGGTTCTGGCG   |
| MAACSRSPVLPCCGGSG   | 121 | ATGGCAGCATGCTCTCGTCTCTGCCCTGTGCTTCCCCCTGTGGCGGTTCTGGCG  |
| MAACYGECQVLPCCGGSG  | 116 | ATGGCAGCATGCTACGGCGAGTGCTAGGTGTGCTCCTTGTGGCGGTTCTGGCG   |
| MAACPSQCTILPPCGGSG  | 112 | ATGGCAGCATGCCCTCTAGTGCACCATCTTCCGCCCTGTGGCGGTTCTGGCG    |
| MAACGVLPPCQRECGGSG  | 107 | ATGGCAGCATGCGCGGTTCTTCTCCCTGCTAGAGGGAGTGTGGCGGTTCTGGCG  |
| MAACTSRCPQLPPCGGSG  | 105 | ATGGCAGCATGCACCTCGCGGTGCCCTCAGCTCCCTCCGTGTGGCGGTTCTGGCG |
| MAACQLPPCSYSCGGSG   | 104 | ATGGCAGCATGCTAGCTGTGCCCCGTGCTCTTATTCTGTGGCGGTTCTGGCG    |
| MAACNTKCSILPPCGGSG  | 101 | ATGGCAGCATGCAACACTAAGTGCTCTATTCTCCCCCTGTGGCGGTTCTGGCG   |
| MAACTVLPPCNYKCGGSG  | 98  | ATGGCAGCATGCACCGTCTTGCCCCGTGCAATTATAAGTGTGGCGGTTCTGGCG  |
| MAACFDRCLQLPPCGGSG  | 97  | ATGGCAGCATGCTTCGATCGTGCCTTAGTTGCCCTTGTGGCGGTTCTGGCG     |
| MAACHSRCPVLPCCGGSG  | 97  | ATGGCAGCATGCCACTCTCGTGCCTTGTGCCCCCTTGTGGCGGTTCTGGCG     |
| MAACLQLPPCAWTCGGSG  | 93  | ATGGCAGCATGCTTGACGTGCCCTTGCGCTTGACGTGTGGCGGTTCTGGCG     |
| MAACPVLPPCISNCGGSG  | 91  | ATGGCAGCATGCCCGTCTCCCCCTGCATTAGTAATTGTGGCGGTTCTGGCG     |
| MAACSILPCTIQCGGSG   | 89  | ATGGCAGCATGCTCTATTCTTCTCCGTGCACGATTTAGTGTGGCGGTTCTGGCG  |
| MAACPYLPPCDFLCGGSG  | 87  | ATGGCAGCATGCCCGTATCTCCCCCTGCGACTTCTCTGTGGCGGTTCTGGCG    |
| MAACSGYCPYLPPCGGSG  | 86  | ATGGCAGCATGCAGCGGTTATTGCCCTACTCCCGCTTGTGGCGGTTCTGGCG    |
| MAACPVLPPCRSDCGGSG  | 86  | ATGGCAGCATGCCCGTGTGCGCCTTGCCGCTCGGATTGTGGCGGTTCTGGCG    |
| MAACPSLPPCRESCGGSG  | 84  | ATGGCAGCATGCCCGAGCCTTCCCCCTTGCCGTGAGAGCTGTGGCGGTTCTGGCG |
| MAACSNRCTLPPCGGSG   | 83  | ATGGCAGCATGCTCTAATCGGTGCACCTTGTGCGCCTTGTGGCGGTTCTGGCG   |
| MAACSILPPCNPCGGSG   | 83  | ATGGCAGCATGCTCGATTCTGCCGCCGTGCAATAGCTCTTGTGGCGGTTCTGGCG |
| MAACLQLPPCSLSCGGSG  | 82  | ATGGCAGCATGCTTGTAGCTCCCTCCGTGCAGTCTCAGCTGTGGCGGTTCTGGCG |
| MAACVSTCQILPPCGGSG  | 82  | ATGGCAGCATGCGTTAGTACGTGTAGATCTCCCCCTTGTGGCGGTTCTGGCG    |
| MAACNVLPPCSSHCGGSG  | 81  | ATGGCAGCATGCAACGCTTGTGCCCTTGTCTCTCATTGTGGCGGTTCTGGCG    |
| MAACNIQSCLPPCGGSG   | 78  | ATGGCAGCATGCAACATTTAGTCTTGCCTTCTCTTGTGGCGGTTCTGGCG      |
| MAACSQGCPSLPPCGGSG  | 77  | ATGGCAGCATGCAGTTAGGGGTGCCCGTGCCTCCGTGTGGCGGTTCTGGCG     |
| MAACPFLPPCSMSCGGSG  | 76  | ATGGCAGCATGCCCTTTCTGCCTCCGTGCTCTATGCTCTGTGGCGGTTCTGGCG  |
| MAACSILPPCRSGCGGSG  | 74  | ATGGCAGCATGCTCCATCTCCCTCTTGCCGACGGGTGTGGCGGTTCTGGCG     |
| MAACPFLPPCNTLCGGSG  | 74  | ATGGCAGCATGCCCTATCTCCCCCTGCAACACTTGTGTGGCGGTTCTGGCG     |



|                            |    |                                                          |
|----------------------------|----|----------------------------------------------------------|
| <b>MAACAAYCPQLPPCGGSG</b>  | 73 | ATGGCAGCATGCGCTGCTTATTGCCCTAGCTTCCTCCTTGTGGCGGTTCTGGCG   |
| <b>MAACQSGCGILPPCGGSG</b>  | 72 | ATGGCAGCATGCTAGAGCGGTTGCGGCATCTTGCCCTCCTGTGGCGGTTCTGGCG  |
| <b>MAACAVGCPIPPCGGSG</b>   | 72 | ATGGCAGCATGCGCCGTTGGGTGCCCATTTTGCCTCCCTGTGGCGGTTCTGGCG   |
| <b>MAACPYLPPCNMQCGGSG</b>  | 71 | ATGGCAGCATGCCCTACCTCCCGCCTTGCAATATGTAGTGTGGCGGTTCTGGCG   |
| <b>MAACSQKCFQLPPCGGSG</b>  | 70 | ATGGCAGCATGCTCTTAGAAGTGCCTTTTAGCTTCCTCCTTGTGGCGGTTCTGGCG |
| <b>MAACILPPCFSCGGSG</b>    | 68 | ATGGCAGCATGCATCTTGCCGCCTTGCCCTTTTCCTGTGGCGGTTCTGGCG      |
| <b>MAACLRNCPVLPCCGGSG</b>  | 68 | ATGGCAGCATGCTTGAGGAATTGCCCTGTTCTTCCTCCTTGTGGCGGTTCTGGCG  |
| <b>MAACSVRCGILPPCGGSG</b>  | 67 | ATGGCAGCATGCAGTGTTCGCTGCGGTATTTGCCTCCTTGTGGCGGTTCTGGCG   |
| <b>MAACPLLPPGANCGGSG</b>   | 67 | ATGGCAGCATGCCCTCTTCTGCCCTTGCGGTGCGAATTGTGGCGGTTCTGGCG    |
| <b>MAACRNQCLILPPCGGSG</b>  | 67 | ATGGCAGCATGCCGAACCAGTGTCTTGATTCTTCTCCCTGTGGCGGTTCTGGCG   |
| <b>MAACAILPPCTLTCCGGSG</b> | 65 | ATGGCAGCATGCGCCATTCCTCCCCCTTGACGCTTACTTGTGGCGGTTCTGGCG   |
| <b>MAACILPPQFKDCGGSG</b>   | 64 | ATGGCAGCATGCATCTGCCTCCCTGCTAGTTCAAGGATTGTGGCGGTTCTGGCG   |
| <b>MAACGQLPPCSVVCGGSG</b>  | 64 | ATGGCAGCATGCGGGTAGCTCCCTCCCTGCTCCGTTGTCTGTGGCGGTTCTGGCG  |
| <b>MAACNTLCPYLPPCGGSG</b>  | 63 | ATGGCAGCATGCAATACTCTTTGCCCTTATCTGCCCTTGTGGCGGTTCTGGCG    |
| <b>MAACVGRCEVLPPCGGSG</b>  | 62 | ATGGCAGCATGCGTCGGGCGTTGGGAGGTTTGCCTCCTTGTGGCGGTTCTGGCG   |
| <b>MAACPQLPPCHVYCGGSG</b>  | 62 | ATGGCAGCATGCCCTAGCTCCCTCCGTGCCACGTTTACTGTGGCGGTTCTGGCG   |
| <b>MAACALLPPCPNACGGSG</b>  | 62 | ATGGCAGCATGCGCGCTGTTGCCGCTTGCCCTAATGCGTGTGGCGGTTCTGGCG   |
| <b>MAACQVRCDILPPCGGSG</b>  | 62 | ATGGCAGCATGCTAGGTCCGTGCGACATCCTCCCGCCTGTGGCGGTTCTGGCG    |
| <b>MAACQFPCLVLPCCGGSG</b>  | 62 | ATGGCAGCATGCTAGTTTCCCTGCCTCGCTCCCTCCGTGTGGCGGTTCTGGCG    |

**Table S2***Most abundant 100 peptides of Library B*

| Peptide sequence     | Freq | Nucleotide sequence                                         |
|----------------------|------|-------------------------------------------------------------|
| MAACSIPLPCNPQCGGSG   | 4513 | ATGGCAGCATGCTCGATTCTTCCTCCGTGCAATCCTCCGTAGTGTGGCGGTTCTGGCG  |
| MAACPLLPPCHLPQCGGSG  | 2041 | ATGGCAGCATGCCCGTTGCTTCCGCCGTGCCATCTTCCTTAGTGTGGCGGTTCTGGCG  |
| MAACQVLPPCGLQLCGGSG  | 1877 | ATGGCAGCATGCCAGGTGTTGCCCTCCGTGCCGTCTGTAGCTGTGTGGCGGTTCTGGCG |
| MAACRQLPPCAEYVCGGSG  | 1291 | ATGGCAGCATGCCCGTAGCTGCCTCCTTGCCTGAGTATGTTTGTGGCGGTTCTGGCG   |
| MAACEPLPPCQLMLCGGSG  | 1048 | ATGGCAGCATGCCCGAGCTTCCGCCGTGCTAGTTGATGCTGTGTGGCGGTTCTGGCG   |
| MAACPMLPPCDLSYCGGSG  | 650  | ATGGCAGCATGCCCTATGCTGCCTCCGTGCGATCTGAGTTATTGTGGCGGTTCTGGCG  |
| MAACGLLPPCHQFHC GGSG | 600  | ATGGCAGCATGCCGGCTTTTGCCGCCTTGCCATTAGTTTCATTGTGGCGGTTCTGGCG  |
| MAACTLLPPCTPDQCGGSG  | 580  | ATGGCAGCATGCACGCTGTTGCCCTCCTTGACGCCGATTAGTGTGGCGGTTCTGGCG   |
| MAACRPKQCWQLPPCGGSG  | 571  | ATGGCAGCATGCCGTCCGAAGCAGTGTGCCAGTTGCCTCCGTGTGGCGGTTCTGGCG   |
| MAACAQLPPCDYSYCGGSG  | 459  | ATGGCAGCATGCCCGTAGCTTCTCCGTGCGATTATTCTGGGTGTGGCGGTTCTGGCG   |
| MAACQILPPCHSPGCGGSG  | 413  | ATGGCAGCATGCTAGATTCTGCCTCCTTGCCATTCGCCGGGTTGTGGCGGTTCTGGCG  |
| MAACPSLPPCWQLQCGGSG  | 244  | ATGGCAGCATGCCCTAGTTTGCTCCTTGCTGGCAGTTGATGTGGCGGTTCTGGCG     |
| MAACEILPPCLQFQCGGSG  | 224  | ATGGCAGCATGCGAGATTTTGCTCCTTGCTTTAGTTTCAGTGTGGCGGTTCTGGCG    |
| MAACVWNNSLLPPCGGSG   | 201  | ATGGCAGCATGCGGTGGAATAATTGCTCTCTTCGCTCCTTGTGGCGGTTCTGGCG     |
| MAACPYLPPCSWDL CGGSG | 192  | ATGGCAGCATGCCCTATCTTCCTCCGTGCTCGTGGGATCTGTGTGGCGGTTCTGGCG   |
| MAACLELPPCQFASCGGSG  | 183  | ATGGCAGCATGCTTGAGTTGCCCGCGTCCAGTTGCTTCGTGTGGCGGTTCTGGCG     |
| MAACEPLPPCTVLKCGGSG  | 176  | ATGGCAGCATGCCCTGAGCTGCCGCCTTGCACGGTCTTAAATGTGGCGGTTCTGGCG   |
| MAACIQLPPCQSSCGGSG   | 175  | ATGGCAGCATGCATTCAGCTTCCGCCTTGCTAGCAGTCTTCGTGTGGCGGTTCTGGCG  |
| MAACQLLPPCQFLQCGGSG  | 169  | ATGGCAGCATGCCAGTCTCTGCCTCCTTGCTAGTTTTTGCAGTGTGGCGGTTCTGGCG  |
| MAACLPPHSCWNQVCGGSG  | 161  | ATGGCAGCATGCCTGCCTCCGCATCTTGCTGGAATCAGGTTTGTGGCGGTTCTGGCG   |
| MAACSQLPPCTYLSCGGSG  | 150  | ATGGCAGCATGCTCTCAGCTTCCGCCTTGCACTTATCTTCGTGTGGCGGTTCTGGCG   |
| MAACRYLPPCPYLKCGGSG  | 149  | ATGGCAGCATGCCCGTATCTTCCTCCTTGCCCTATAAGCTGTGTGGCGGTTCTGGCG   |
| MAACLYPRCPSPPCGGSG   | 143  | ATGGCAGCATGCCTGTATCCGCGTTGCCCTTCTCTTCCTCCGTGTGGCGGTTCTGGCG  |
| MAACLQLPPCGVSLCGGSG  | 137  | ATGGCAGCATGCCTGTAGTGCCTGCGGTTGCTAGTCTGTGTGGCGGTTCTGGCG      |
| MAACQLLPPCAIQWCGGSG  | 126  | ATGGCAGCATGCCAGTTGCTTCCGCCGTGCCGATTAGTGGTGTGGCGGTTCTGGCG    |
| MAACAILPPCQLSCGGSG   | 123  | ATGGCAGCATGCGCTATCTGCGCCGTGCCGGCAGCTTAGTTGTGGCGGTTCTGGCG    |
| MAACLTLPPCQAVSCGGSG  | 122  | ATGGCAGCATGCCTACTCTTCCTCCTTGCTAGGCGGTTCTTGTGGCGGTTCTGGCG    |
| MAACYLLPPCPSTSCGGSG  | 122  | ATGGCAGCATGCTATTTGTTGCCCGCGTCCCTTCGACGCTTGTGGCGGTTCTGGCG    |
| MAACLTLPPCPSFTCGGSG  | 106  | ATGGCAGCATGCTTGACTTTGCCCGCGTCCCGTCTTTACTTGTGGCGGTTCTGGCG    |
| MAACILPPCPTSEYCGGSG  | 104  | ATGGCAGCATGCATTCGCTCCTTGCCCGACTTCGGAGTATTGTGGCGGTTCTGGCG    |
| MAACSVLPPCSFVACGGSG  | 100  | ATGGCAGCATGCTCGGTGTTGCCCTCCTTGCTCTTTGTTGCTGTGGCGGTTCTGGCG   |
| MAACHYLPPCQPAICGGSG  | 90   | ATGGCAGCATGCCATTATTGCGCCCTTGCTAGCCGGCATTGTGGCGGTTCTGGCG     |
| MAACSLPPCHSTNCGGSG   | 73   | ATGGCAGCATGCAGTCTTCTTCCTCCGTGCCATTCGACGAATTGTGGCGGTTCTGGCG  |
| MAACPLLPPCHLSFCGGSG  | 70   | ATGGCAGCATGCCCGTTGCTGCCTCCGTGCCATCTTTCTTTTGTGGCGGTTCTGGCG   |
| MAACQSTFCPIPLPCGGSG  | 68   | ATGGCAGCATGCTAGTCTACGTTTTGCCCGATTCTGCCTCCTTGTGGCGGTTCTGGCG  |
| MAACGYLPPCNYLHCGGSG  | 61   | ATGGCAGCATGCCGTTATTTGCCCTCCTTGCAATTATCTGCATTGTGGCGGTTCTGGCG |
| MAACTLLPPCSSLQCGGSG  | 59   | ATGGCAGCATGCACCTTGTGCCCGCGTCTTCTCTTCAGTGTGGCGGTTCTGGCG      |
| MAACPLLPPCRN TVCGGSG | 57   | ATGGCAGCATGCCCTCTGTTGCCCTCCTTGCCGGAATACGGTTTGTGGCGGTTCTGGCG |
| MAACPNQTCPLLPCGGSG   | 53   | ATGGCAGCATGCCCTAATTAGACGTGCCCTTGTGCTCCTTGTGGCGGTTCTGGCG     |
| MAACKVLPPCSAQR CGGSG | 52   | ATGGCAGCATGCAAGTTCTGCCTCCGTGCTCGGCTTAGCGGTGTGGCGGTTCTGGCG   |
| MAACLLLPPCPIMTCGGSG  | 48   | ATGGCAGCATGCCTCTGCTTCCGCCTTGCCCGATTATGACGTGTGGCGGTTCTGGCG   |
| MAACLLASCPILPCGGSG   | 47   | ATGGCAGCATGCTTGCTGGCTTCGTGCCCGATTCTTCCTCCGTGTGGCGGTTCTGGCG  |

|                      |    |                                                             |
|----------------------|----|-------------------------------------------------------------|
| MAACILPPCPTTIPCGGSG  | 43 | ATGGCAGCATGCATTCTCCGCCGTGCCCGACGACGATTCCCGTGTGGCGGTTCTGGCG  |
| MAACRHLPPCTQLRCGGSG  | 42 | ATGGCAGCATGCCGTCATCTGCCGCCGTGCACGTAGCTTCGGTGTGGCGGTTCTGGCG  |
| MAACAQLPPCPSQACGGSG  | 40 | ATGGCAGCATGCGCGTAGTTGCCCTCCGTGCCCTTCTTAGGCGTGTGGCGGTTCTGGCG |
| MAACSALPPCQWAQCGGSG  | 40 | ATGGCAGCATGCAGTGTCTGCCGCCTTGCTAGTGGGCTCAGTGTGGCGGTTCTGGCG   |
| MAACHLLPPCGRQSCGGSG  | 37 | ATGGCAGCATGCCATCTTTGCCCTCCGTGCGGTCGTTAGTCGTGTGGCGGTTCTGGCG  |
| MAACSRLPPCVILDCGGSG  | 36 | ATGGCAGCATGCTCTAGGCTTCTCCTTGCCTTATTCTGATGTGGCGGTTCTGGCG     |
| MAACQQLPPCMPRFCCGGSG | 36 | ATGGCAGCATGCCAGTAGTTGCCCTTGCATGCCTCGGTTTTGTGGCGGTTCTGGCG    |
| MAACPVLPPCFTRLCCGGSG | 35 | ATGGCAGCATGCCCGTCTGCCCTCCGTGCTTACTCGTTTGTGTGGCGGTTCTGGCG    |
| MAACSLLPPCTFVACGGSG  | 33 | ATGGCAGCATGCTCGTTGCTGCCGCCGTGCACCTTTGTGGCGTGTGGCGGTTCTGGCG  |
| MAACAILPPCHFRSCGGSG  | 30 | ATGGCAGCATGCGGATCTTCCGCCTTGCCATTTTCGGTTCGTGTGGCGGTTCTGGCG   |
| MAACYLLPPCAISVCGGSG  | 29 | ATGGCAGCATGCTATCTTTGCCGCCCTTGCGCGATTTTCGGTTTGTGGCGGTTCTGGCG |
| MAACALLPPCFIQECGGSG  | 29 | ATGGCAGCATGCGCTCTGTTGCCGCCGTGCTTTATTTAGGAGTGTGGCGGTTCTGGCG  |
| MAACLLLPPCPSINCGGSG  | 29 | ATGGCAGCATGCCCTTCTGCTTCTCCGTGCCCTTCGATTAATTGTGGCGGTTCTGGCG  |
| MAACLTLPPCVLQCGGSG   | 28 | ATGGCAGCATGCTTGACGCTGCCGCCGTGCTGCTGCAGTAGTGTGGCGGTTCTGGCG   |
| MAACPQLPPCIHSYCGGSG  | 28 | ATGGCAGCATGCCCTCAGTGCCTCCGTGCATTCATTCTTATTGTGGCGGTTCTGGCG   |
| MAACKFLPPCGGSG       | 27 | ATGGCAGCATGCAAGTTCTTCTCCTTGTGGCGGTTCTGGCG                   |
| MAACPMLPPCGIFPCGGSG  | 27 | ATGGCAGCATGCCGATGCTTCCGCCCTTGCGGGATTTTTCTTGTGGCGGTTCTGGCG   |
| MAACRVLPPCSEYNCGGSG  | 26 | ATGGCAGCATGCAGGGTGTGCCCTCCGTGCTCTGAGTATAATTGTGGCGGTTCTGGCG  |
| MAACPILPPCPTQCGGSG   | 26 | ATGGCAGCATGCCCTATTTGCCCTTCCGCCCGACTCAGTGTGGCGGTTCTGGCG      |
| MAACLLLPPCAPTTCGGSG  | 26 | ATGGCAGCATGCTTGTGCTGCCGCCCTTGCGCGCGACTACTTGTGGCGGTTCTGGCG   |
| MAACSLLPPCTPVLCCGGSG | 26 | ATGGCAGCATGCTCTCTGCTTCCGCCCTTGACTCCTGTTTTGTGTGGCGGTTCTGGCG  |
| MAACVLPCHWSLQCGGSG   | 26 | ATGGCAGCATGCGTCTTCTCCTTGCCATTGGTTCGCTGCAGTGTGGCGGTTCTGGCG   |
| MAACVVLPPCPLQTCGGSG  | 24 | ATGGCAGCATGCGTGTGTTGCCCTCCGTGCCCGTTCAGACTTGTGGCGGTTCTGGCG   |
| MAACNLLPPCPPLSCGGSG  | 22 | ATGGCAGCATGCAATCTGCTGCCCTTCCGCCCTCTGCTTGTGGCGGTTCTGGCG      |
| MAACSTLPPCQLLHCGGSG  | 21 | ATGGCAGCATGCAGTACGCTGCCGCCCTTGCTAGTGTGTCATTGTGGCGGTTCTGGCG  |
| MAACQLGSCMVLPPCGGSG  | 21 | ATGGCAGCATGCTAGCTTGGTCTTGCATGGTGTGCCCTCCGTGTGGCGGTTCTGGCG   |
| MAACARSTCPLPPCGGSG   | 21 | ATGGCAGCATGCGCGCGGTTACGTGCCCGCAGTGCCTCCTTGTGGCGGTTCTGGCG    |
| MAACQYLHCSVLPCCGGSG  | 20 | ATGGCAGCATGCTAGTATTTGCATTGCTCTGTTCTGCCCTCCGTGTGGCGGTTCTGGCG |
| MAACFLLPPCQVALCGGSG  | 20 | ATGGCAGCATGCTTTCTTTGCCCTCTGCTAGGTTGCGCTTGTGGCGGTTCTGGCG     |
| MAACPTLPPCHNLQCGGSG  | 19 | ATGGCAGCATGCCGACGCTTCTCCGTGCCATAATTAGTGTGTGGCGGTTCTGGCG     |
| MAACMVLPCCPHQRCCGGSG | 19 | ATGGCAGCATGCATGGTGTGCCCTCCGTGCCCTCATCAGCGGTGTGGCGGTTCTGGCG  |
| MAACDAWRCPVLPCCGGSG  | 19 | ATGGCAGCATGCGATGCTTGGAGGTGCCCTGTGTTGCCCTCCGTGTGGCGGTTCTGGCG |
| MAACSLLPPCGSTTCGGSG  | 18 | ATGGCAGCATGCTCTTTGTGCCCTTCCGTGCCGTTCTACTACGTGTGGCGGTTCTGGCG |
| MAACPVLPPCRTIWC GGSG | 18 | ATGGCAGCATGCCCGTGTGCCCTCCGTGCCGTAATTGGTGTGGCGGTTCTGGCG      |
| MAACPPQPCPYLPPCGGSG  | 17 | ATGGCAGCATGCCCGCTTAGCCGTGCCCTTATCTGCCCTCCTTGTGGCGGTTCTGGCG  |
| MAACPTLPPCQPYCGGSG   | 16 | ATGGCAGCATGCCGACGCTTCCCTCCTTGCCAGCCTGGTATTGTGGCGGTTCTGGCG   |
| MAACLPPHCPLSLCCGGSG  | 16 | ATGGCAGCATGCTGCCGCCCTATAATTGCCCGCTTCTCTTTGTGGCGGTTCTGGCG    |
| MAACFTAKCLQLPPCGGSG  | 16 | ATGGCAGCATGCTTACGGCTAAGTGCCTTAGCTCCGCCCTTGTGGCGGTTCTGGCG    |
| MAACRFLSCSVLPPCGGSG  | 16 | ATGGCAGCATGCAGGTTTTGAGTTGCAGTGTGTTGCCCTCCTTGTGGCGGTTCTGGCG  |
| MAACYHFTCPVLPCCGGSG  | 14 | ATGGCAGCATGCTATCATTTTACTTGCCCTGTGCTTCTCCTTGTGGCGGTTCTGGCG   |
| MAACSRVPCNQLPPCGGSG  | 13 | ATGGCAGCATGCTCTCGGTTCTTGCATTAGCTTCTCCGTGTGGCGGTTCTGGCG      |
| MAACQELPPCLQIQCGGSG  | 12 | ATGGCAGCATGCCAGGAGCTTCCGCCCTGCCTGCAGATTTAGTGTGGCGGTTCTGGCG  |
| MAACPTKSCLLPPCGGSG   | 12 | ATGGCAGCATGCCCTACGAAGTCTTGCCTTTGCTTCTCCGTGTGGCGGTTCTGGCG    |
| MAACPTARCTQLPPCGGSG  | 12 | ATGGCAGCATGCCCTACGGCGGGTGCACGTAGTGTGCCCTTGTGGCGGTTCTGGCG    |
| MAACFYLPPCQDLFCGGSG  | 12 | ATGGCAGCATGCTTTATCTGCCCTCCGTGCTAGGATTTGTTTTGTGGCGGTTCTGGCG  |
| MAACYLPPCPSLPHCGGSG  | 11 | ATGGCAGCATGCTATCTTCCGTGCCCGTCTGCTCCTATTGTGGCGGTTCTGGCG      |

|                            |    |                                                              |
|----------------------------|----|--------------------------------------------------------------|
| <b>MAACLRPPCDILPPCGGSG</b> | 11 | ATGGCAGCATGCTTGCCTCGGCCGTGCGATATTCCTCCGCCTTGTGGCGGTTCTGGCG   |
| <b>MAACSSLPPCYPFQCGGSG</b> | 11 | ATGGCAGCATGCAGTTCGTTGCCCTCCTTGCTATCCGTTTATAGTGTGGCGGTTCTGGCG |
| <b>MAACGAKYCSYLPPCGGSG</b> | 11 | ATGGCAGCATGCGGGGCGAAGTATTGCTCGTATTTGCCCTCCTTGTGGCGGTTCTGGCG  |
| <b>MAACSSLPPCSTSECGGSG</b> | 11 | ATGGCAGCATGCTCGAGTTTGCCCTCCTTGCTCGACTTCTGAGTGTGGCGGTTCTGGCG  |
| <b>MAACQYLPPCSFLVCGGSG</b> | 11 | ATGGCAGCATGCCAGTATCTTCCCTCCTTGCTCTTTTTTGGTTTGTGGCGGTTCTGGCG  |
| <b>MAACVPLRCTLPPCGGSG</b>  | 10 | ATGGCAGCATGCGTTCCTCTTCGGTGCACCTTCTGCCTCCGTGTGGCGGTTCTGGCG    |
| <b>MAACLLPPCSIQCGGSG</b>   | 10 | ATGGCAGCATGCCTTTTGTGTGCCGCCTTGCTCTATTTAGGGTTGTGGCGGTTCTGGCG  |
| <b>MAACIGSLCPVLPPCGGSG</b> | 9  | ATGGCAGCATGCATTGGTAGTTTGTGCCCGGTTCTCCCTCCGTGTGGCGGTTCTGGCG   |
| <b>MAACRTLPPCSDLTCGGSG</b> | 9  | ATGGCAGCATGCCGTACGCTGCCTCCTTGCTCTGATCTTACTTGTGGCGGTTCTGGCG   |
| <b>MAACSQLPPCSIIKCGGSG</b> | 9  | ATGGCAGCATGCTCGTAGCTTCCGCCGTGCAGTATTATTAAGTGTGGCGGTTCTGGCG   |
| <b>MAACLLPPCQHQMCGGSG</b>  | 8  | ATGGCAGCATGCCTTCTGTGCTGCCGCCTTGCCAGCATTAGATGTGTGGCGGTTCTGGCG |
| <b>MAACALLPPCSWVSCGGSG</b> | 8  | ATGGCAGCATGCGGTTGCTGCCGCCGTGCTCGTGGGTGTCTTGTGGCGGTTCTGGCG    |
| <b>MAACKTLPPCPLRLCGGSG</b> | 8  | ATGGCAGCATGCAAGACTCTGCCTCCTTGCCCTCTGCGTCTTTGTGGCGGTTCTGGCG   |
| <b>MAACYVLPPCSNVVCGGSG</b> | 8  | ATGGCAGCATGCTATGTTCTTCCCTCCGTGCTCTAATGTGGTGTGTGGCGGTTCTGGCG  |
| <b>MAACKHLPPCSVAYCGGSG</b> | 8  | ATGGCAGCATGCAAGCATTGCCCTCCTTGCTCTGTTGCTTATTGTGGCGGTTCTGGCG   |
| <b>MAACLVLPPCFLVDCGGSG</b> | 8  | ATGGCAGCATGCCTTGTTCCTCCGCCTTGCTTTTTTGGTGGATGTGGCGGTTCTGGCG   |

**Table S3***Most abundant 100 peptides of Library 6x6*

| Peptide sequence         | Freq | Nucleotide sequence                                                  |
|--------------------------|------|----------------------------------------------------------------------|
| MAACRAKQVCCLAADRTCGGSG   | 4773 | ATGGCAGCGTGTCTGCGAAGCAGGTGTGTTGCTTGCGGCGGATCGTACGTGTGGCGGTTCTGGCG    |
| MAACWKRQVCCLSQDRLCGGSG   | 3992 | ATGGCAGCGTGTGGAAGAGGCAGGTGTGTTGCCTTTCGTAGGATAGGTTGTGTGGCGGTTCTGGCG   |
| MAACQGILPPCGRGGGGCGGSG   | 3402 | ATGGCAGCGTGTAGGGGATTTGCCGCCCTTGCGGGCGTGGTGGTGGTGGTGTGGCGGTTCTGGCG    |
| MAACTCRKVCCLAQEMPCGGSG   | 2782 | ATGGCAGCGTGTACGTGTCGGAAGGTGTGTTGCTTGCGGTAGGAGATGCCTGTGTGGCGGTTCTGGCG |
| MAACTHRKGCCVAQEVCVCGGSG  | 1709 | ATGGCAGCGTGTACTCATAGGAAGGGGTGTGCGTGGCTTAGGAGGTTGTTGTGGCGGTTCTGGCG    |
| MAACGPRKVCCLSQEVICGGSG   | 1529 | ATGGCAGCGTGTGGGCCGAGGAAGGTTTGTGCTGAGTTAGGAGGTGATTGTGGCGGTTCTGGCG     |
| MAACSWLQSECSISSCGGSG     | 1406 | ATGGCAGCGTGTCTTGGTGTAGAGTGAGTGCAGTATTATTAGTAGTGGTGTGGCGGTTCTGGCG     |
| MAACGQVLPPEHSGASRGGSG    | 936  | ATGGCAGCGTGTGGGTAGGTGCTTCTCCTTGCGAGCATTCTGGGGCGTCGCGTGGCGGTTCTGGCG   |
| MAACMYQAALCSSILPPCGGSG   | 924  | ATGGCAGCGTGTATGTATTAGCGGGCGTGTGCTCTAGTATTCTTCCCTCGTGTGGCGGTTCTGGCG   |
| MAACMQRVCCLSYEQKCGGSG    | 821  | ATGGCAGCGTGTATGTAGAGGCAGGTGTGTTGCCTGAGTTATGAGAAGCAGTGTGGCGGTTCTGGCG  |
| MAACWRKTVCCLAERSCGGSG    | 768  | ATGGCAGCGTGTGGCGGAAGACTGTGTGTTGCCTGGCTGCTAGAGGAGTTGTGGCGGTTCTGGCG    |
| MAACERRAVCCVPELHCGGSG    | 658  | ATGGCAGCGTGTGAGAGGGCGGTGTTTGTGCGTTTCTCCTGAGTTGCATTGTGGCGGTTCTGGCG    |
| MAACLQWRADCQHVLPCCGGSG   | 454  | ATGGCAGCGTGTCTTCACTGAGGGCGGATTGCTAGCATGTGCTGCCCTCCGTGTGGCGGTTCTGGCG  |
| MAACYGVLPPCQFTGGPCGGSG   | 442  | ATGGCAGCGTGTATGGTGTCTGCTCCCTGCTAGTTACTGGTGGTCTTGTGGCGGTTCTGGCG       |
| MAACIWAQGYCGEPARNCGGSG   | 421  | ATGGCAGCGTGTATTTGGGCGTAGGGGATTGCGGGGAGCCTGCTCGGAATTGTGGCGGTTCTGGCG   |
| MAACGVSQAFSLPPWHCGGSG    | 402  | ATGGCAGCGTGTGGGCTCATAGGCCTTCTCGTTGCCTCCGTGGCATTGTGGCGGTTCTGGCG       |
| MAACQGGVVTCPHILPPCGGSG   | 400  | ATGGCAGCGTGTAGGGTGGGGTGTGACGTGCCCTCATATTTGCCCGCGTGTGGCGGTTCTGGCG     |
| MAACFRSVCCLSKELLCGGSG    | 372  | ATGGCAGCGTGTACTCGTAGTGTGTGTGCCTTCTAAGGAGCTGCTGTGTGGCGGTTCTGGCG       |
| MAACLSRQVCLQKDLPCGGSG    | 346  | ATGGCAGCGTGTCTTAGTAGGCAGTTTGTGCTTGTAGAAGATCTGCCCTGTGGCGGTTCTGGCG     |
| MAACGGILPPCTYQVPACGGSG   | 313  | ATGGCAGCGTGTGGGGGATTTCTCCTTGCACGTATTAGTGCCTGCGTGTGGCGGTTCTGGCG       |
| MAACQNYLKSCLPPYDCGGSG    | 299  | ATGGCAGCGTGTAGAATTATTTGAAGAGTTGCGGGTGCCTCCGTATGATTGTGGCGGTTCTGGCG    |
| MAACALLPPQCPAYVEECGGSG   | 298  | ATGGCAGCGTGTGCTCTGTGCCTCCGTAGTGCCTCCGCGTATGTTGAGAGTTGTGGCGGTTCTGGCG  |
| MAACSGRYACCLSQLECCGGSG   | 296  | ATGGCAGCGTGTAGTGGGAGTATGCGTGTGCTTGTGCTAGGAGTTGGAGTGTGGCGGTTCTGGCG    |
| MAACSGEYKQVLPCCGGSG      | 249  | ATGGCAGCGTGTGGGGGAGTATGGTAAGTGTAGGTGCTGCCCTCCGTGTGGCGGTTCTGGCG       |
| MAACHKQSNRCVGLVLPCCGGSG  | 243  | ATGGCAGCGTGTACATAAGTAGAGTAATCGGTGCGTGGGTGTTTGGCCCGTGTGGCGGTTCTGGCG   |
| MAACKLRQVCCVDAAGYCGGSG   | 226  | ATGGCAGCGTGTAAAGTGTAGGTAGGTTTGTGCGTGGATGCTGCGGGGATTGTGGCGGTTCTGGCG   |
| MAWCGQLPPCGGSG           | 223  | ATGGCTTGGTGGCGGGGTTAGTTGCCGCCCTGTGGCGGTTCTGGCG                       |
| MAACLTVLPYSSSCGGSG       | 194  | ATGGCAGCGTGTCTGACGGTTTTTGGCCCTTATTCTAGTAGTGTGGCGGTTCTGGCG            |
| MAACQDVIDGCTGILPPCGGSG   | 189  | ATGGCAGCGTGTAGGATGTACTGATGGTTGCACTGGTATTCTTCCCTCGTGTGGCGGTTCTGGCG    |
| MAACQGILPPCNVGRITCGGSG   | 184  | ATGGCAGCGTGTAGGGGATTTGCCCGCGTCAATGTGGGTCGACTGGTGTGGCGGTTCTGGCG       |
| MAACPYQLPPCDSSPLDCGGSG   | 183  | ATGGCAGCGTGTCCGTATTAGCTTCCGCCCTTGCATTCTAGTCTTGGATTGTGGCGGTTCTGGCG    |
| MAACDLVLPWCQGSQWGGSG     | 174  | ATGGCAGCGTGTGATCTGGTCTGCCGCCCTTGGTAGGGGCTTAGGGTGGGGCGGTTCTGGCG       |
| MAACGGARKCCLDTSHSCGGSG   | 173  | ATGGCAGCGTGTGGGGTGCAGGAAGTGTGCTTGGATACTGCTCATTCTGTGGCGGTTCTGGCG      |
| MASCQTLLPPCGGSG          | 171  | ATGGCTTCGTGCTAGACGCTGCTTCTCCTTGTGGCGGTTCTGGCG                        |
| MAACGGPLKCCGRLPPCGGSG    | 161  | ATGGCAGCGTGTGGTGGGCCCTTTGAAGAAGTGTGCTGGTAGGTTGCCCTTGTGGCGGTTCTGGCG   |
| MAACGGVLPCCLEKVECCGGSG   | 158  | ATGGCAGCGTGTGGTGGGGTGTGCTCCGTGCTAGTTGGAGAAGGTTGAGTGTGGCGGTTCTGGCG    |
| MAACSWARVCCQLQIDKECCGGSG | 155  | ATGGCAGCGTGTCTTGGGCGCGTGTGTGTTGCTTGTAGATTGATAAAGAGTGTGGCGGTTCTGGCG   |
| MAACLGVLPCCGMFNFRGGSG    | 152  | ATGGCAGCGTGTGGGTGTGTGCTCCGTGCGGTATGTTAATTTTTAGCGTGGCGGTTCTGGCG       |
| MAACMKKGVCCLPDVRCCGGSG   | 141  | ATGGCAGCGTGTATGAAGAAGGGGTGTGTTGCCTTGTCCGGATGTGAGGTGTGGCGGTTCTGGCG    |
| MAACTNALQRCCGTLPPCGGSG   | 136  | ATGGCAGCGTGTACGAATGCTCTGTAGAGGTGCGGTGGTACGCTTCCGCCGTGTGGCGGTTCTGGCG  |
| MAACVKRVALCCGQLPPCGGSG   | 134  | ATGGCAGCGTGTGTGAAGCGTGTGCGTGTGCTGTGGTGTAGCTTCCCTCCGTGTGGCGGTTCTGGCG  |
| MAACVGTERRACFTQLPPCGGSG  | 130  | ATGGCAGCGTGTGTGGTACTGAGAGGGCGTGTCTTACTTGTAGTGCCTTCTGTGGCGGTTCTGGCG   |

|                         |     |                                                                    |
|-------------------------|-----|--------------------------------------------------------------------|
| MAACRWDLQEC SAYLPPCGGSG | 130 | ATGGCAGCGTGTGGTGGGATTTGTAGGAGTGCAGTGCATCTTCTCCGTGTGGCGTTCTGGCG     |
| MAACDFLQQA FILPPCGGSG   | 125 | ATGGCAGCGTGTGATTTTGTAGTTGCAGCAGTGCAGTGTATCTTCCGCTTGTGGCGTTCTGGCG   |
| MAACGGQSLECR IYLPCCGGSG | 121 | ATGGCAGCGTGTGGTGGTGTAGTCTTTGGAGTGCAGGATTTATCTTCTCCTTGTGGCGTTCTGGCG |
| MAACSTSLRCGGQLPPCGGSG   | 121 | ATGGCAGCGTGTTCGACTACTTCTCTGAGGTGCAGTGGGTAGTTGCCTCCTTGTGGCGTTCTGGCG |
| MAACQLAKRCCG GALPPCGGSG | 118 | ATGGCAGCGTGTAGCTTGTCTAAGCGTGTGGCGGGGGCTTGCCTCCGTGTGGCGTTCTGGCG     |
| MAACEWLDRA CSQVLPCCGGSG | 116 | ATGGCAGCGTGTGAGTGGCTGGATCGTGCCTGCTCTAGGTGCTGCCCTTGTGGCGTTCTGGCG    |
| MAACWDQTRRCKELPPCGGSG   | 115 | ATGGCAGCGTGTGGGATTAGACTCGTAGGTGCTGTAAAGGAGTGCCTCCGTGTGGCGTTCTGGCG  |
| MAACSSRKVCLASDVTCGGSG   | 113 | ATGGCAGCGTGTAGTAGTAGAAGTGTGTGGCTGGCTAGTGATGTACTTGTGGCGTTCTGGCG     |
| MAACPMVLPCCQHTLHECGGSG  | 111 | ATGGCAGCGTGTCTATGTTTCTGCCCTTGTAGCATACTTGCATGAGTGTGGCGTTCTGGCG      |
| MAACRGLPPCAPAYECGGSG    | 109 | ATGGCAGCGTGTCTGGGATTTGCCTCCGTGCCTTAGGCGTATGAGTGTGGCGTTCTGGCG       |
| MAACSSQLPPCDRVQELGGSG   | 108 | ATGGCAGCGTGTCTCAGTGCCTGCCCTGCGATCGCGTGTAGGAATTGGCGTTCTGGCG         |
| MAACRYTQESPHILPPCGGSG   | 107 | ATGGCAGCGTGTCTTATACGTAGGAGTGCCTCATATTTGCCTCCGTGTGGCGTTCTGGCG       |
| MAACWDKRVCCVAPWRPCGGSG  | 104 | ATGGCAGCGTGTGGGATAAGCGTGTGTGGCTGGCGCTTGGCGTCTTGTGGCGTTCTGGCG       |
| MAACQGTLPCCPAGIKPCGGSG  | 101 | ATGGCAGCGTGTAGGGACCTTCCGCTTGCCTGGCGGATTAAGCCTTGTGGCGTTCTGGCG       |
| MAACDQYQEECTHILPPCGGSG  | 98  | ATGGCAGCGTGTGATACGTATTAGGAGGAGTGCCTCATATTTGCCCTTGTGGCGTTCTGGCG     |
| MAACPPLLPPCGGSGTACGGSG  | 97  | ATGGCAGCGTGTCTAATTTGCTTCCGCTTGCCTGGGGGCTTGTAGACGGCTTGTGGCGTTCTGGCG |
| MAACSYLEQTCNQYLPCCGGSG  | 91  | ATGGCAGCGTGTAGTTATCTTGTAGCAGACGTGAATTAGTATCTTCTCCTTGTGGCGTTCTGGCG  |
| MAACTSVLPCCSGNEQLCGGSG  | 90  | ATGGCAGCGTGTACTTCGGTCTTCCCTGCTGCTGTAATGAGTAGCTTGTGGCGTTCTGGCG      |
| MAACSLPPQCTFGSPSCGGSG   | 90  | ATGGCAGCGTGTAGTCTGTGCTCCGTAGTGCACGTTGGTTCGCGCTTGTGGCGTTCTGGCG      |
| MAACTQHGRQCGHFLPPCGGSG  | 88  | ATGGCAGCGTGTACGTAGCATGGCGGCAGTGCAGGATTTTGCCTCCGTGTGGCGTTCTGGCG     |
| MAACLRLVGCVCVERPCGGSG   | 88  | ATGGCAGCGTGTGGGTTCTGGGTGTGGCTGAGTGTGAGCGTCCGTGTGGCGTTCTGGCG        |
| MAACVFLPPCPQGSHLCCGGSG  | 87  | ATGGCAGCGTGTGTCTTTTCTTCCGCTGCCTTAGGGTCTCATCTGTGTGGCGTTCTGGCG       |
| MAACGRYLPCCQSPHNCGGSG   | 86  | ATGGCAGCGTGTGGTAGGTATCTTCCGCTGCCTCAGAGTCCCTATAATTGTGGCGTTCTGGCG    |
| MAACGSARKKCLSVLPCCGGSG  | 86  | ATGGCAGCGTGTGGAGTGCAGTAAAGTGTGCTTGTCTTGTGCTCCTTGTGGCGTTCTGGCG      |
| MAACLPLPPCDGDCLQCGGSG   | 83  | ATGGCAGCGTGTGGCGTGTGCTGCCCTTGCAGTGGTATTGTCTTCACTGAGTGTGGCGTTCTGGCG |
| MAACMTGQRCRGGVLPCCGGSG  | 82  | ATGGCAGCGTGTATGACGGGTAGGGGCTTGCCTGGGTGTTGCCTCCTTGTGGCGTTCTGGCG     |
| MAACHGRQVCCCLAPRPPCGGSG | 81  | ATGGCAGCGTGTATGGTCGGCAGGTGTGTTGCCTTGCCTGCTCGGCGTGTGGCGTTCTGGCG     |
| MAACLLPRECGQLPLPCGGSG   | 81  | ATGGCAGCGTGTGGTGGTCCGAGGAGTGCAGTGTAGTGCCTCCTTGTGTGGCGTTCTGGCG      |
| MAACEGVLPPCQLTQYCGGSG   | 81  | ATGGCAGCGTGTAGGGGGTGTGCTCCTTGCCTGAGTGCAGCAGTATTGTGGCGTTCTGGCG      |
| MAACTWINGVCDGILPPCGGSG  | 80  | ATGGCAGCGTGTACTTGGATTAAGTGTGTGCGATGTTTGTGCTCCTTGTGGCGTTCTGGCG      |
| MAACPGLPPCQLGRPPCGGSG   | 79  | ATGGCAGCGTGTCCGGTCTGTGCTCCGTGCTAGCTTGGTCTCCGGTGTGGCGTTCTGGCG       |
| MAACRQWLPPCPVGGTACGGSG  | 79  | ATGGCAGCGTGTAGGCAGTGGCTGCTCCTTGCCTTGTGGGGGACGGCTTGTGGCGTTCTGGCG    |
| MAACGIAGLPCSQVLPCCGGSG  | 77  | ATGGCAGCGTGTGGGATTGTGGTCTTCTTGTCTTATAGTGTCTCCTTGTGGCGTTCTGGCG      |
| MAACTCYGKKCLNVLPCCGGSG  | 76  | ATGGCAGCGTGTACTTGTATGTAAGAAGTGCCTAATGTTCTGCTCCTTGTGGCGTTCTGGCG     |
| MAACGQILPPCNFQINGCGGSG  | 76  | ATGGCAGCGTGTGGTATGATTCTTCTCCTTGCATTTTATAGTAATGGTGTGGCGTTCTGGCG     |
| MAACKHLLPPCDYMSQNCGGSG  | 73  | ATGGCAGCGTGTAAAGCATGCTTCTCCGTGCATTATATAGTTAGAATTGTGGCGTTCTGGCG     |
| MAACHSDVQPCPNLPPCGGSG   | 73  | ATGGCAGCGTGTATAGTGTATTAGCCGTGCCGAATATTGCTCCTTGTGGCGTTCTGGCG        |
| MAACEYELQLCGNTLPPCGGSG  | 72  | ATGGCAGCGTGTGAGTATGAGTTGAGCTTGTGCGTAATACTTCCGCTGTGGCGTTCTGGCG      |
| MAACVGRPLPNCGLPPWQCGGSG | 72  | ATGGCAGCGTGTGGTGTGCTGCTCAATTGCGCTTCTCCTTGGTGTGGCGTTCTGGCG          |
| MAACVSRRCCLDIAHQCGGSG   | 69  | ATGGCAGCGTGTTCGAGGCGGGTTTGTGCTGGATATTGCTCATAGTGTGGCGTTCTGGCG       |
| MAACQARFDRCLPPWNCGGSG   | 69  | ATGGCAGCGTGTAGGCTAGTTTGTATGCTGGGTCTTCCGCTGGAATTGTGGCGTTCTGGCG      |
| MAACTQYPQSCAGILPPCGGSG  | 68  | ATGGCAGCGTGTACGTAGTATCCGACGTGTGCGTGGGATTTCCGCTGTGGCGTTCTGGCG       |
| MAACGIQRVCLAPDVACGGSG   | 67  | ATGGCAGCGTGTGGTATTAGAGGTGTGTGCTTGGCTCCTGATGTGCTTGTGGCGTTCTGGCG     |
| MAACNSAVQKCCGQLPPCGGSG  | 67  | ATGGCAGCGTGTAACTTGTGTGCAAGTGTGTGGGTAGCTTCCGCTTGTGGCGTTCTGGCG       |
| MAACWHKQMCVVDIKAPCGGSG  | 67  | ATGGCAGCGTGTGGCATAAGTAGATGTGTGGTGTGATTAAGGCTCCGTGTGGCGTTCTGGCG     |
| MAACGGLLPPCGLSLQECGGSG  | 66  | ATGGCAGCGTGTGGGGTGTGCTGCCGCTGCGTGTGAGTGTAGGAGTGTGGCGTTCTGGCG       |

|                               |    |                                                                       |
|-------------------------------|----|-----------------------------------------------------------------------|
| <b>MAACWWQAKRCGLILPPCGGSG</b> | 65 | ATGGCAGCGTGTGGTGGCAGGCGAAGCGGTGCGGGTTGATTCTTCCTCCTTGTGGCGGTTCTGGCG    |
| <b>MAACFPKAVCLASELLCGGSG</b>  | 65 | ATGGCAGCGTGTTCCTCGAAGGCTGTGTGTTGCTTGGCTTCTGAGTTGTTGTGTGGCGGTTCTGGCG   |
| <b>MAACPLILPPCGLSGRNCGGSG</b> | 65 | ATGGCAGCGTGTCCGCTTATTTTGCCTCCGTGCGGTCTGTCTGGGCGTAATTGTGGCGGTTCTGGCG   |
| <b>MAACNVWEQHCQNILPPCGGSG</b> | 64 | ATGGCAGCGTGTAAATGTTTGGGAGCAGCATTGCTAGAATATTCTTCCTCCTTGTGGCGGTTCTGGCG  |
| <b>MAACGGQLPPCGVVYSSCGGSG</b> | 63 | ATGGCAGCGTGTGGTGGGTAGCTTCCGCCGTGCGGGTGGTTTATTCTAGTTGTGGCGGTTCTGGCG    |
| <b>MAACDSQVKKCANLLPPCGGSG</b> | 63 | ATGGCAGCCTGTGATTCTTAGGTGAAGAAGTGCCTAATCTGCTGCCTCCTTGTGGCGGTTCTGGCG    |
| <b>MAACEYRVDPCGQLLPPCGGSG</b> | 63 | ATGGCAGCGTGTGAGTATCGTGTGGATCCGTGCGGGTAGTTGTTGCCTCCGTGTGGCGGTTCTGGCG   |
| <b>MAACGVVLPQGMNWC GGSG</b>   | 63 | ATGGCAGCGTGTGGTGTGGTGTGCCCTTGCCTTAGGGTATGAATTGGTGTGGCGGTTCTGGCG       |
| <b>MAACTGVLPPCSYKSERCGGSG</b> | 63 | ATGGCAGCGTGTACTGGTGTGTTGCCGCCGTGCTCTTATAAGAGTGAGCGTTGTGGCGGTTCTGGCG   |
| <b>MAACSGVLPQSGRMQSCGGSG</b>  | 63 | ATGGCAGCGTGTAGTGGGTGTGCTCCTTGCAGTGGGAGGATGTAGTCGTGTGGCGGTTCTGGCG      |
| <b>MAACRGVLPQNSAQVCGGSG</b>   | 63 | ATGGCAGCGTGTAGGGGGTGTGCTCCTCCGTGCAATAGTGCCTAGGTGGGGTGTGGCGGTTCTGGCG   |
| <b>MAACTRPQDACPHILPPCGGSG</b> | 62 | ATGGCAGCGTGTACGGGCCGTAGGATGCGTGCCTCATATTCTGCCTCCGTGTGGCGGTTCTGGCG     |
| <b>MAACPRILPPCASQAPLCGGSG</b> | 62 | ATGGCAGCGTGTCTCGGATTCTGCCGCCCTTGCCTGCGGAGTTAGGCTCCGCTTGTGGCGGTTCTGGCG |
